# Supplementary material for: Spin coherence phenomena of an S = 1/2 copper(ii) system in a polyoxometalate with a less-abundant nuclear spin
Source: Royal Society of Chemistry journal article supplement (doi:10.1039/d4dt02832e), 2024-12-10
Supplement: d4dt02832e1.pdf [file d4dt02832e1.pdf]

Electronic Supplementary Information

Spin coherence phenomena of a  $S = 1/2$  copper(II) system  
in a polyoxometalate with a less-abundant nuclear-spin

Toshiharu Ishizaki<sup>\*a</sup>, Mizue Asada<sup>b</sup>, Toshikazu Nakamura<sup>b</sup> and Tomoji Ozeki<sup>\*a</sup>

a. Department of Chemistry, College of Humanities and Sciences, Nihon University, 3-25-40 Sakurajosui, Setagaya-ku, Tokyo 156-8550, Japan.

E-mail: [ishizaki.toshiharu@nihon-u.ac.jp](mailto:ishizaki.toshiharu@nihon-u.ac.jp), [ozeki@chs.nihon-u.ac.jp](mailto:ozeki@chs.nihon-u.ac.jp)

b. Institute for Molecular Science, Myodaiji, Okazaki 444-8585, Japan.

## Contents

### General information

Figure S1 Powder X-ray diffraction patterns of (a) **1%dil.1** (light blue), (b)  $[(n\text{-C}_4\text{H}_9)_4\text{N}]_4\text{H}_2[\text{SiW}_{11}\text{O}_{39}\text{Zn}]$  (black) and (c)  $[(n\text{-C}_4\text{H}_9)_4\text{N}]_4\text{H}_2[\text{SiW}_{11}\text{O}_{39}\text{Cu}]$  (blue).

Figure S2 (red line) X-band (9.65 GHz) continuous-wave electron spin resonance spectrum of **1%dil.1** measured at room temperature and (blue line) the simulation using the following parameters:  $g_{\parallel} = 2.34$ ,  $g_{\perp} = 2.07$ ,  $A_{\parallel} = 411$  MHz,  $A_{\perp} = 8$  MHz.

Figure S3 X-band (9.0 GHz) continuous-wave electron spin resonance spectrum of an independently prepared sample of **1%dil.1** measured at (a) 291 K, (b) 100 K, (c) 16.3 K, and (d) 4.35 K.

Figure S4 Echo-detected field-swept ESR spectrum of **1%dil.1** measured at room temperature.

Figure S5 Spin-echo decays of **1%dil.1** obtained by performing the Hahn echo sequence on the transition of 3330 Oe at the indicated temperatures, and the corresponding fitting curves.

Figure S6 Spin-echo decays of **1%dil.1** obtained by performing the Hahn echo sequence on the transition at 2760 Oe at the indicated temperatures, along with the corresponding fitting curves.

Table S1 Fitting parameters used in the stretched monoexponential decay (eq. 1) of the transition of **1%dil.1** at 3330 Oe.

Table S2 Fitting parameters used in the stretched monoexponential decay (eq. 1) of the transition of **1%dil.1** at 2760 Oe.

Figure S7 Inversion recovery traces obtained for the transition of **1%dil.1** at 3330 Oe at the indicated temperatures, along with the corresponding fitting curves.

Table S3 Fitting parameters used in the stretched monoexponential decay (eq. 2) of the transition of **1%dil.1** at 3330 Oe.

## General information

### Preparation of magnetic dilution sample

$[(n\text{-C}_4\text{H}_9)_4\text{N}]_4\text{H}_2[\text{SiW}_{11}\text{O}_{39}\text{Cu}_{0.01}\text{Zn}_{0.99}]$  (**1%dil.1**) was prepared according to the previous report.<sup>refS1</sup>

A mixture of  $[(n\text{-C}_4\text{H}_9)_4\text{N}]_4\text{H}_2[\text{SiW}_{11}\text{O}_{39}\text{Cu}]$  (**1**) and its diamagnetic congener  $[(n\text{-C}_4\text{H}_9)_4\text{N}]_4\text{H}_2[\text{SiW}_{11}\text{O}_{39}\text{Zn}]$ , synthesized by the reported methods, in a molar ratio of 1 : 99 was dissolved in acetonitrile and filtered through Celite. The filtrate was concentrated on a rotary evaporator and dried under reduced pressure for several hours to give powder form of **1%dil.1**.

### Electron spin resonance (ESR) measurements

Continuous-wave (CW) ESR measurements at between 4.35-291 K were performed on a JEOL JES-FA300 spectrometer at X-band (~9.0 GHz) frequency using a 5 mm quartz ESR tube. (typical conditions used: microwave frequency = 9.06 GHz; modulation frequency = 100 kHz; modulation amplitude = 0.3 mT; time constant = 0.03 s; and microwave power = 0.04 mW).

CW ESR measurement at room temperature and pulsed ESR measurements were performed on Bruker E680 spectrometer operated at X-band (~9.6 GHz) using a 5 mm quartz ESR tube. A Bruker standard dielectric resonator (ER4118X-MD5W) with TE011 mode was used. For pulsed ESR measurements, 1 kW amplified microwave irradiation was optimized to a fixed  $\pi/2$  pulse of 16 ns. The echo decay measurements were conducted using a Hahn-echo (two-pulse) sequence. The pulse interval  $\tau$  between the first  $\pi/2$  pulse and the second  $\pi$  pulse was varied.  $T_M$  was obtained by stretched exponential fitting of decay curves. Inversion recovery measurements were conducted using a three-pulse spin echo sequence. The first  $\pi$  pulse was irradiated, with an interval  $\tau$  before the second  $\pi/2$  pulse being varied. The third pulse irradiated after 0.2  $\mu\text{s}$  of interval, and then the echo signal followed after 0.2  $\mu\text{s}$  of interval was observed.  $T_1$  was obtained by stretched exponential fitting of recovery curves.

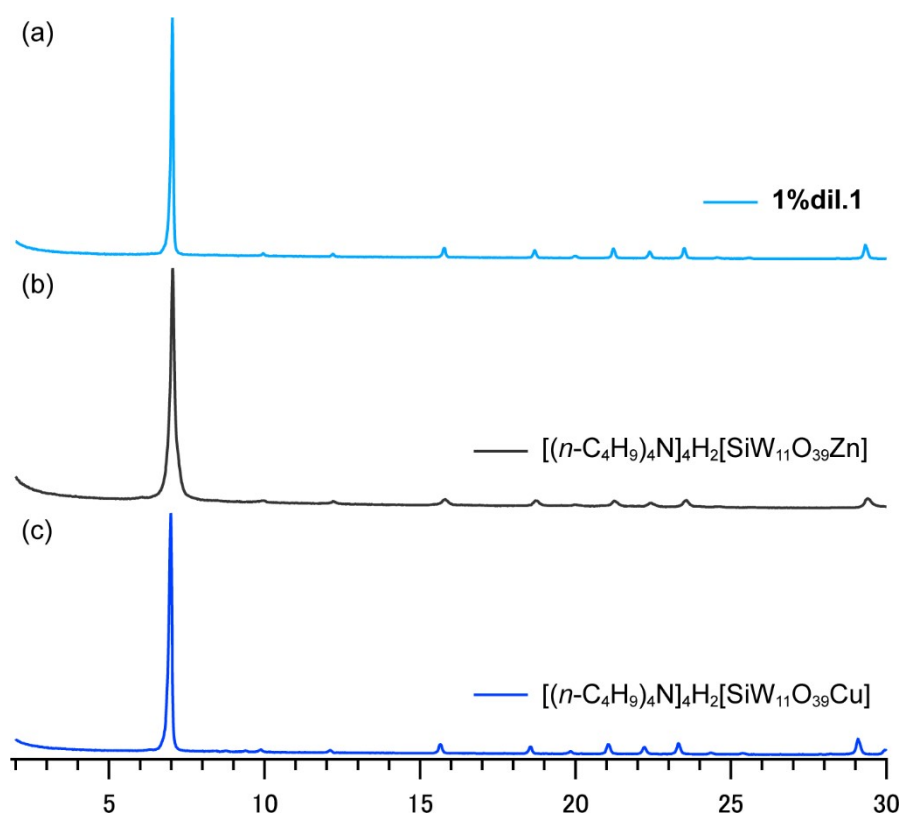

Figure S1 Powder X-ray diffraction patterns of (a) **1%dil.1** (light blue), (b)  $[(n\text{-C}_4\text{H}_9)_4\text{N}]_4\text{H}_2[\text{SiW}_{11}\text{O}_{39}\text{Zn}]$  (black) and (c)  $[(n\text{-C}_4\text{H}_9)_4\text{N}]_4\text{H}_2[\text{SiW}_{11}\text{O}_{39}\text{Cu}]$  (blue).

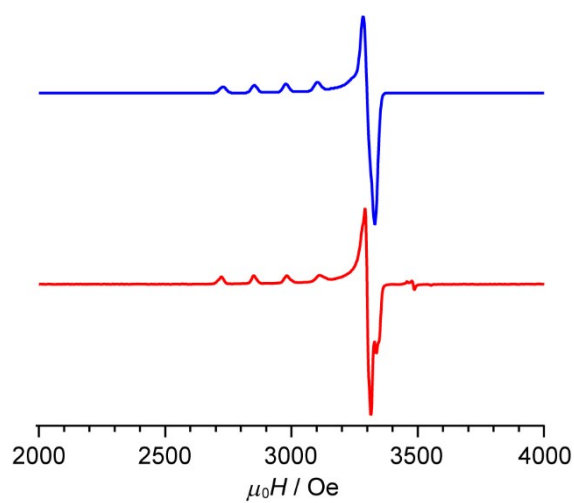

Figure S2 (red line) X-band (9.65 GHz) continuous-wave electron spin resonance spectrum of **1%dil.1** measured at room temperature and (blue line) the simulation using the following parameters:  $g_{\parallel} = 2.34$ ,  $g_{\perp} = 2.07$ ,  $A_{\parallel} = 411$  MHz,  $A_{\perp} = 8$  MHz.

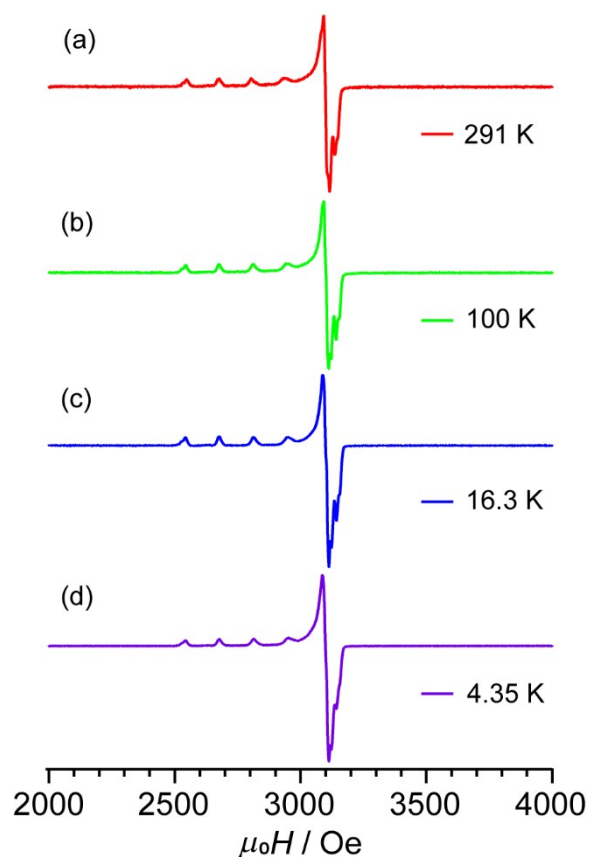

Figure S3 X-band (9.0 GHz) continuous-wave electron spin resonance spectrum of an independently prepared sample of **1%dil.1** measured at (a) 291 K, (b) 100 K, (c) 16.3 K, and (d) 4.35 K.

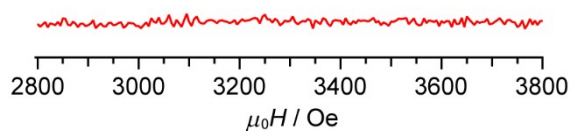

Figure S4 Echo-detected field-swept ESR spectrum of **1%dil.1** measured at room temperature.

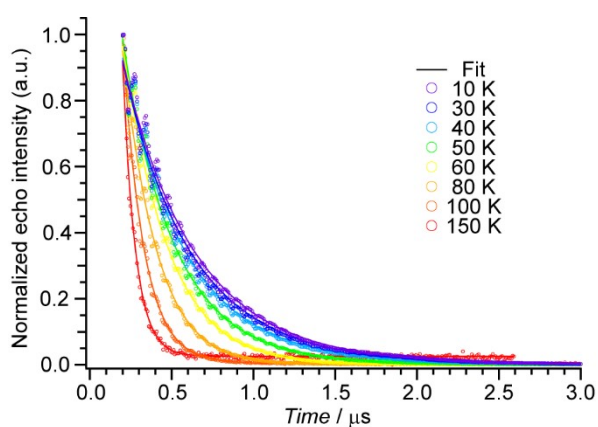

Figure S5 Spin-echo decays of **1%dil.1** obtained by performing the Hahn echo sequence on the transition of 3330 Oe at the indicated temperatures, and the corresponding fitting curves.

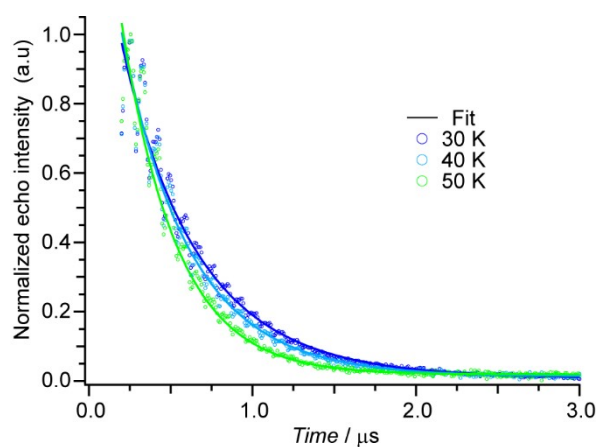

Figure S6 Spin-echo decays of **1%dil.1** obtained by performing the Hahn echo sequence on the transition at 2760 Oe at the indicated temperatures, along with the corresponding fitting curves.

Table S1 Fitting parameters used in the stretched monoexponential decay (eq. 1) of the transition of **1%*dil.*1** at 3330 Oe.

| $T / \text{K}$ | $I_0$                 | $A$             | $T_M / \mu\text{s}$ | $\beta_M$         |
|----------------|-----------------------|-----------------|---------------------|-------------------|
| 10             | $0.00045 \pm 0.00005$ | $1.50 \pm 0.01$ | $0.425 \pm 0.01$    | $0.955 \pm 0.005$ |
| 30             | $0.0006 \pm 0.001$    | $1.57 \pm 0.1$  | $0.390 \pm 0.02$    | $0.93 \pm 0.02$   |
| 40             | $0.00074 \pm 0.0001$  | $1.67 \pm 0.07$ | $0.355 \pm 0.015$   | $0.93 \pm 0.02$   |
| 50             | $0.00085 \pm 0.0001$  | $1.98 \pm 0.3$  | $0.294 \pm 0.04$    | $0.94 \pm 0.06$   |
| 60             | $0.0011 \pm 0.0001$   | $1.84 \pm 0.2$  | $0.300 \pm 0.03$    | $1.08 \pm 0.06$   |
| 80             | $0.0019 \pm 0.0002$   | $2.20 \pm 0.3$  | $0.234 \pm 0.03$    | $1.11 \pm 0.07$   |
| 100            | $0.0040 \pm 0.0004$   | $4.80 \pm 1.7$  | $0.125 \pm 0.04$    | $0.99 \pm 0.11$   |
| 150            | $0.026 \pm 0.002$     | $12.0 \pm 4.0$  | $0.077 \pm 0.017$   | $1.00 \pm 0.10$   |

Table S2 Fitting parameters used in the stretched monoexponential decay (eq. 1) of the transition of **1%*dil.*1** at 2760 Oe.

| $T / \text{K}$ | $I_0$              | $A$             | $T_M / \mu\text{s}$ | $\beta_M$       |
|----------------|--------------------|-----------------|---------------------|-----------------|
| 30             | $0.008 \pm 0.0010$ | $1.55 \pm 0.20$ | $0.445 \pm 0.055$   | $0.94 \pm 0.06$ |
| 40             | $0.013 \pm 0.0015$ | $1.66 \pm 0.24$ | $0.400 \pm 0.070$   | $0.96 \pm 0.09$ |
| 50             | $0.019 \pm 0.0010$ | $1.79 \pm 0.01$ | $0.346 \pm 0.024$   | $1.03 \pm 0.05$ |

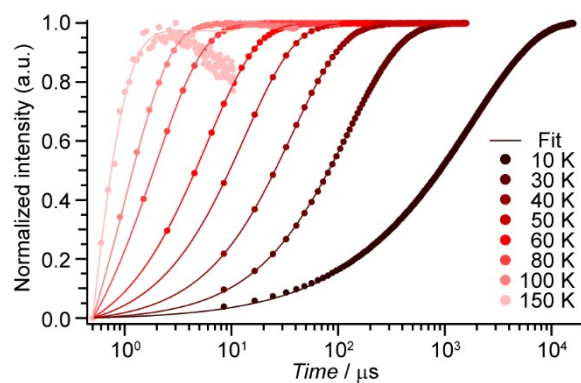

Figure S7 Inversion recovery traces obtained for the transition of **1%dil.1** at 3330 Oe at the indicated temperatures, along with the corresponding fitting curves.

Table S3 Fitting parameters used in the stretched monoexponential decay (eq. 2) of the transition of **1%dil.1** at 3330 Oe.

| $T / \text{K}$ | $I_0$             | $A$                | $T_1 / \mu\text{s}$ | $\beta_1$        |
|----------------|-------------------|--------------------|---------------------|------------------|
| 10             | $1.025 \pm 0.001$ | $-1.032 \pm 0.001$ | $1680 \pm 20$       | $0.62 \pm 0.01$  |
| 30             | $1.001 \pm 0.001$ | $-1.009 \pm 0.001$ | $124 \pm 0.5$       | $0.85 \pm 0.03$  |
| 40             | $0.998 \pm 0.001$ | $-1.019 \pm 0.001$ | $37.1 \pm 0.01$     | $0.90 \pm 0.02$  |
| 50             | $0.999 \pm 0.001$ | $-1.051 \pm 0.001$ | $13.3 \pm 0.001$    | $0.91 \pm 0.01$  |
| 60             | $0.999 \pm 0.001$ | $-1.111 \pm 0.001$ | $5.88 \pm 0.06$     | $0.91 \pm 0.002$ |
| 80             | $0.998 \pm 0.005$ | $-1.33 \pm 0.001$  | $1.89 \pm 0.01$     | $0.93 \pm 0.04$  |
| 100            | $0.997 \pm 0.002$ | $-1.641 \pm 0.04$  | $0.998 \pm 0.05$    | $1.01 \pm 0.02$  |
| 150            | $0.974 \pm 0.020$ | $-4.09 \pm 0.01$   | $0.349 \pm 0.01$    | $1.01 \pm 0.002$ |

Ref. S1 T. Ishizaki and T. Ozeki, *Dalton Trans.*, 2023, **52**, 4678.
